# Supplementary material for: Novel Image-Guided Flexible-Probe Transbronchial Microwave Ablation for Stage 1 Lung Cancer
Source: PubMed Central journal article supplement — Respiration. 2023 Jan 18;102(3):182–93. doi: 10.1159/000528820 (PMC10064382; doi:10.1159/000528820), 2023-01-18
Supplement: res-0102-0182-s04.pdf [file res-0102-0182-s04.pdf]

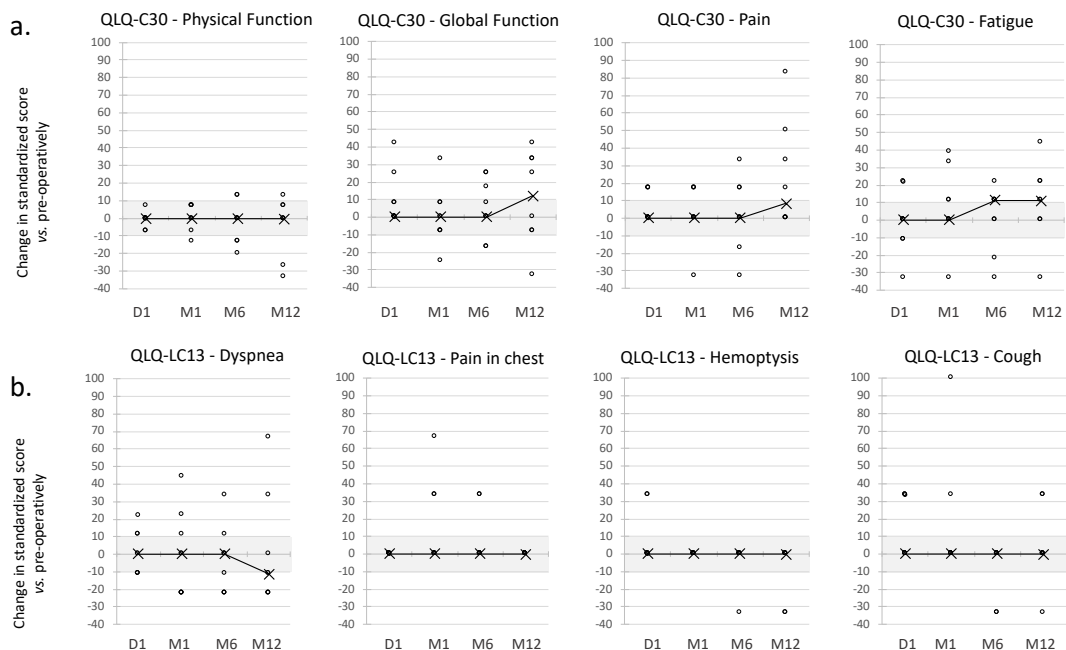

**Online Supplementary Figure S1. Health-related quality-of-life scores as determined using the QLQ-C30 and QLQ-LC13 questionnaires.** Raw scores were standardized using linear transformation to a 0-100 scale according to EORTC scoring guidelines.<sup>34</sup> Shown are the changes in standardized scores, relative to the baseline score (pre-procedure), of selected QLQ-C30 (a) and QLQ-LC13 scales (b) as obtained on post-procedure day 1 (D1), month 1 (M1), month 6 (M6), and month 12 (M12). Plots show the median (X) and individual values (o) for each time point. Shaded areas indicate the positive and negative MCID of 10 points. N=10 for D1 (except for QLQ-LC13 Dyspnea, where N=8), N=9 for M1 and M6, and N=8 for M12. A comprehensive overview of all functional and symptom scales is provided in Online Supplementary Table S3. For global health status/QOL and functional scales, a high score indicates better functioning; for symptom scales, a high score represents a high level of symptoms.
