# Supplementary material for: Novel Image-Guided Flexible-Probe Transbronchial Microwave Ablation for Stage 1 Lung Cancer
Source: PubMed Central journal article supplement — Respiration. 2023 Jan 18;102(3):182–93. doi: 10.1159/000528820 (PMC10064382; doi:10.1159/000528820), 2023-01-18
Supplement: res-0102-0182-s05.pdf [file res-0102-0182-s05.pdf]

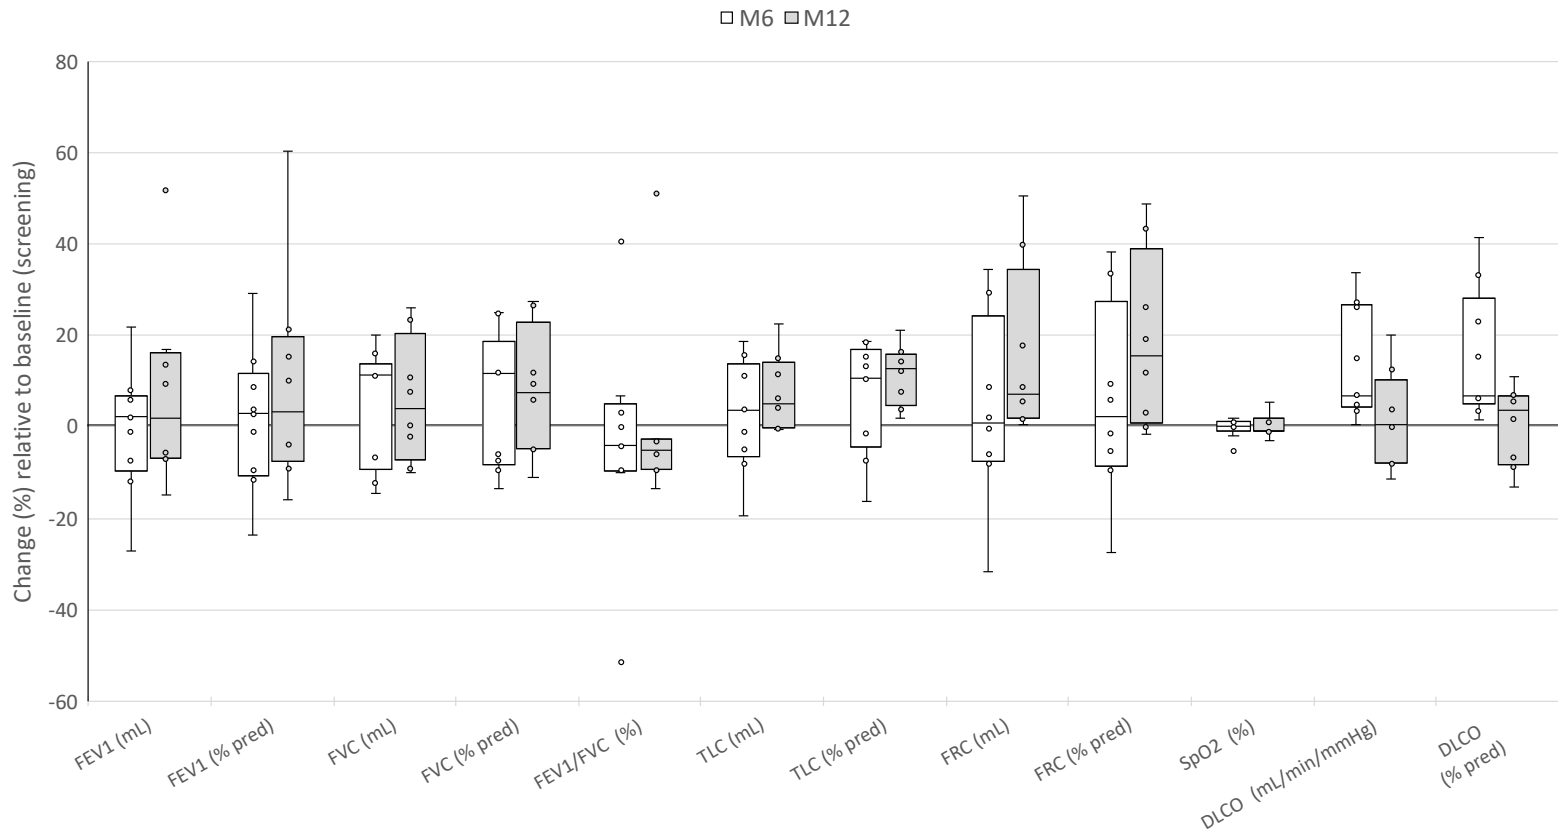

**Online Supplementary Figure S2. Pulmonary Function tests.** Longitudinal changes in pulmonary function indices are expressed as relative (%) change from the baseline (screening visit). Shown are the interquartile range with median (box and horizontal line), minimum and maximum value (whiskers) and inner individual values (circles). N=9 for month 6 (M6) and N=8 for month 12 (M12). FEV1, forced expiratory volume at 1 second; FVC, forced vital capacity; TLC, total lung capacity; FRC, function residual capacity; SpO2, peripheral capillary oxygen saturation; DLCO, diffusion capacity of the lungs for carbon monoxide; pred, predicted.
